1 **PCBP2 as an intrinsic aging factor regulates the senescence of hBMSCs through**  
2 **the ROS-FGF2 signaling axis**

3

4 Pengbo Chen\*<sup>1</sup>, Bo Li\*<sup>1</sup>, Zeyu Lu<sup>1</sup>, Qingyin Xu<sup>1</sup>, Huoliang Zheng<sup>1</sup>, Shengdan Jiang<sup>1</sup>,

5 Leisheng Jiang<sup>1</sup> and Xinfeng Zheng<sup>1</sup>

6 <sup>1</sup> Spine Center, Xinhua Hospital, Shanghai Jiaotong University School of Medicine,

7 Shanghai 200092, China

8 \* These authors contributed equally to this article.

9

10 **Author details:**

11 Pengbo Chen : e-mail: 403807657@qq.com, ORCID: 0000-0003-1783-3773

12 Bo Li : e-mail: libo01@xinhumed.com.cn

13 Zeyu Lu: jsycluzy@163.com

14 Qingyin Xu: 79725740@qq.com

15 Huoliang Zheng: 050552052@sjtu.edu.cn

16 Shengdan Jiang : e-mail: jiangshengdan@xinhumed.com.cn

17 Leisheng Jiang: e-mail: jiangleisheng@xinhumed.com.cn, ORCID: 0000-0001-6503-

18 7443

19 Xinfeng Zheng: e-mail: zhengxinfeng@xinhumed.com.cn, ORCID: 0000-0001-8355-

20 2967.

21

22 **Running title:**

23 PCBP2 regulates the senescence of hBMSCs

24

25 **Conflict of interest disclosure:**

26 No conflict of interest to disclose.

27

28 **Correspondence to:**

29 Xinfeng Zheng (e-mail: [zhengxinfeng@xinhumed.com.cn](mailto:zhengxinfeng@xinhumed.com.cn), telephone: +86

30 13761819645), Spine Center, Xinhua Hospital, Shanghai Jiaotong University School of

31 Medicine, Shanghai 200092, China.

32 Leisheng Jiang (e-mail: [jiangleisheng@xinhumed.com.cn](mailto:jiangleisheng@xinhumed.com.cn), telephone: +86

33 13651689376), Spine Center, Xinhua Hospital, Shanghai Jiaotong University School of

34 Medicine, Shanghai 200092, China.

35

36

37 **Data Availability Statement**

38 The datasets used and/or analyzed during the current study are available from the

39 corresponding author on reasonable request.

40

41 **Funding Statement**

42 This study was supported by the National Natural Science Foundation of China

43 (82172474).

44

45 **Ethics approval statement**

46 Experimental protocols involving human specimens were approved by the Ethics

47 Committee of Xinhua Hospital Affiliated to Shanghai Jiaotong University School

48 of Medicine (XHECNSFC2021159).

49

50

51

52

53 **PCBP2 as an intrinsic aging factor regulates the senescence of hBMSCs through**  
54 **the ROS-FGF2 signaling axis**

55

56

57 **Abstract**

58

59 **Background:** It has been reported that loss of PCBP2 led to increased reactive  
60 oxygen species (ROS) production and accelerated cell aging. Knockdown of PCBP2  
61 in HCT116 cells leads to significant down-regulation of fibroblast growth factor 2  
62 (FGF2). Here, we tried to elucidate the intrinsic factors and potential mechanisms of  
63 BMSCs aging from the interactions among PCBP2, ROS and FGF2.

64 **Methods:** Unlabeled quantitative proteomics were performed to show differentially  
65 expressed proteins in the replicative senescent human-derived bone marrow stromal  
66 cells (RS-hBMSCs). ROS and FGF2 were detected in the loss-and-gain cell function  
67 experiments of PCBP2. The function recovery experiments were performed to verify  
68 whether PCBP2 regulates cell function through ROS/FGF2-dependent ways.

69 **Results:** PCBP2 expression was significantly lower in P10-hBMSCs. Knocking down  
70 the expression of PCBP2 inhibited the proliferation while accentuated the apoptosis  
71 and cell arrest of RS-hBMSCs. PCBP2 silence could increase the production of ROS.  
72 On the contrary, overexpression of PCBP2 increased the viability of both P3-hBMSCs  
73 and P10-hBMSCs significantly. Meanwhile, over-expression of PCBP2 led to  
74 significantly reduced expression of FGF2. Overexpression of FGF2 significantly  
75 offset the effect of PCBP2 overexpression in P10-hBMSCs, leading to decreased cell  
76 proliferation, increased apoptosis and reduced G0/G1 phase ratio of the cells.

77 **Conclusion:** This study initially elucidates that PCBP2 as an intrinsic aging factor  
78 regulates the replicative senescence of hBMSCs through the ROS-FGF2 signaling  
79 axis.

80 **Keywords:** Osteoporosis; senescence; hBMSCs; PCBP2; ROS; FGF2.

81

82 **Introduction**

83

84 With the aging of the population, the incidence of osteoporosis is increasing globally.  
85 It is believed that the decrease in the number and "adaptability" of bone marrow  
86 mesenchymal stromal cells (BMSCs) is one of the key factors leading to  
87 osteoporosis[1]. With aging, the proliferation and function of BMSCs are impaired  
88 due to intrinsic and environmental factors[2], however, the underlying mechanism  
89 remains largely unknown.

90 The poly(rC)-binding protein 2 (PCBP2) is a RNA-binding protein and regulates  
91 gene expression at multiple levels including mRNA metabolism and translation. It has  
92 been reported that knock-out of PCBP2 led to decreased expression of p73 in a variety  
93 of cell lines, which in turn led to increased reactive oxygen species (ROS) production  
94 and accelerated cell aging[3]. However, whether PCBP2 influences cell aging through  
95 a ROS-dependent way is still unknown. ROS is a by-product of aerobic metabolism,  
96 including superoxide anion ( $O_2^-$ ), hydrogen peroxide ( $H_2O_2$ ) and hydroxyl radical  
97 ( $OH\cdot$ ), and has a wide range of biological targets and reactivity[4]. The disorder of  
98 ROS affects many cell functions, such as cell proliferation, cell apoptosis, autophagy  
99 and cellular senescence[4, 5]. In our pilot study, we found that the expressions of  
100 PCBP2 was significantly lower in P10-hBMSCs than in P3-hBMSCs. Therefore, we  
101 speculate that PCBP2 may be one of the intrinsic factors of aging of the BMSCs, and  
102 participates in the regulation of the cellular function of the cells by acting on the  
103 production of ROS.

104 In GSE95024 downloaded from the GENE EXPRESSION OMNIBUS (GEO)  
105 database, we analyzed by bioinformatics methods and found that after knockdown of  
106 PCBP2 in HCT116 cells, the expression of fibroblast growth factor 2 (FGF2) was  
107 significantly down-regulated in the cells. FGF2 has been reported to have functions in  
108 cell proliferation, senescence and G2/M arrest[6-8]. FGF2 was also crucial to the  
109 stemness maintenance of BMSCs with fibronectin and bone morphogenetic protein 4  
110 [9]. FGF2-induced inhibition of RhoA/ROCK signaling played a key role in BMSCs  
111 differentiation into endothelial cells[10]. FGF2 isoforms were also found to be able to  
112 inhibit the mineralization of BMSCs [11]. Meanwhile, it has been reported that

113 reactive oxygen species could mediate FGF2 release[12]. IL-1 $\beta$  promoted FGF-2  
114 expression in chondrocytes through the ROS/AMPK/p38/NF- $\kappa$ B signaling  
115 pathway[13]. FGF-2 could be released by plasma-produced ROS[14].

116 As mentioned above, our understanding of the interactions among PCBP2, ROS  
117 and FGF2 in the aging process of BMSCs seems to be insufficient. The in-depth  
118 exploration of the mechanism of aging of the BMSCs is expected to provide  
119 additional information for the pathogenesis and clinical intervention of osteoporosis.  
120 We hypothesize that PCBP2 is an intrinsic aging factor of BMSCs and regulates the  
121 senescence of hBMSCs through a ROS and FGF2 dependent pathway.

122

## 123 **Materials and Methods**

124

### 125 **Hayflick model of cellular aging**

126 The human BMSCs (hBMSCs) were obtained from healthy male individuals who  
127 underwent traumatic femoral or tibia shaft fracture treatment by intramedullary  
128 nailing. Cell extraction and passage were performed as previously described[15].  
129 hBMSCs were cultured in Dulbecco's Modified Eagle Medium (DMEM) with high  
130 glucose containing 10% fetal bovine serum. It is well accepted that the expansion of  
131 BMSCs in culture will accelerate senescence, and the differentiation potential will  
132 decrease from the 6th generation. In the 10th generation, the average number of  
133 cumulative population doublings drops from 7.7 to 1.2[16]. Thus, after passage of the  
134 hBMSCs cells, the third-generation cells were labeled as P3 (*in vitro* non-senescence  
135 model, P3-hBMSCs) and the tenth-generation cells were labeled as P10 (*in vitro*  
136 replication senescence model, P10-hBMSCs). The cells were incubated in an  
137 incubator at 37 °C with 5% CO<sub>2</sub>, and the culture medium was changed every two  
138 days.

139

### 140 **GSE95024 analysis**

141 The GSE95024 data was downloaded from the GEO database, including four groups  
142 of HCT116 cells with silenced PCBP2 and four groups of negative controls. R.3.5.2

143 software was used to screen out differentially expressed genes, and  $\log_{2}FC \geq 2$  and  
144  $p < 0.01$  was regarded as significance. The STRING (<https://string-db.org/cgi/input.pl>)  
145 tool was used to predict the interaction among differentially expressed genes in  
146 protein levels.

147

#### 148 **Unlabeled quantitative proteomics**

149 The hBMSCs cells were lysed with RIPA, and the protein content of the cells was  
150 quantified using BCA Protein Assay kits (Abcam, USA). Dithiothreitol (1 M), 200  $\mu$ L  
151 UA buffer, 40  $\mu$ L trypsin buffer, 25  $\mu$ L 25 mM  $NH_4HCO_3$  and 50  $\mu$ L 0.1%  
152 trifluoroacetic acid (TFA) were added in sequence and then centrifuged to obtain the  
153 peptides, which were quantified using the BCA kits. After desalting with a RP-C18  
154 solid phase extraction column, the peptides were washed with 90% acetonitrile-water  
155 containing 0.1% TFA. After elution with 90% acetonitrile-water containing 0.1%  
156 TFA, the sample was reconstituted with 0.1% formic acid in water and finally  
157 analyzed using Liquid Chromatography/Mass Spectrometry (Thermo Electron  
158 Corporation, LCQ Deca XP MAX10).

159

#### 160 **Transfection**

161 Cells were inoculated into 24-well plates, and when the cell confluence reached 30–  
162 50%, they were transfected with small interfering RNA (siRNA) to knockdown  
163 PCBP2 (sequence: 5' -GGCCTATACCATCAAGGA- 3'), or transfected with  
164 plasmids over-expressing PCBP2 or FGF2. In accordance with the transfection  
165 procedure provided by Gene Pharma (Shanghai Gene Pharmaceutical Technology  
166 Co., Ltd.), 48 hours after transfection, the cells were used for subsequent experiments.

167

#### 168 **Real-time quantitative PCR (QRT-PCR)**

169 The extraction of total RNA and reverse transcription were performed according to  
170 our standard protocol, as described previously [17, 18]. Reverse transcription was  
171 performed using Superscript II (ThermoFisher Scientific) and Fast SYBR Green

172 (ThermoFisher Scientific) was used for qPCR. The sequences of the primers used  
173 were as in table 1.

174

#### 175 **Western blotting (WB) experiment**

176 The steps for protein extraction and WB were the same as our previously published  
177 procedure [17]. According to the WB protocol, the primary antibodies, all of which  
178 were human anti-rabbit antibodies PCBP2 (Abcam, USA), FGF2 (Abcam, USA),  
179 FRS2 (Abcam, USA), and  $\alpha$ -tubulin (Cell Signaling Technology, CST, USA) were  
180 incubated with nitrocellulose (NC) membrane overnight at a dilution of 1:1500, and  
181 then incubated with secondary HRP-conjugated antibody (1:1000, rabbit anti-mouse  
182 antibody, Abcam, USA) for 1 hour. Finally, the proteins were detected using Pierce  
183 SuperSignal West Pico Chemiluminescence Detection Kits (Thermo Fisher, MA,  
184 USA), and image and protein density were photographed and calculated by Image J  
185 system, respectively.

186

#### 187 **Cell Counting Kit-8 (CCK-8) experiment**

188 The cells were inoculated into 96-well plates with 2000 cells/well and cultured for 24  
189 hours. Then, 10  $\mu$ L of CCK-8 reagent (WST-8/CCK8, ab228554, Abcam, USA) and  
190 90  $\mu$ L of serum-free medium were added to each well, and incubated for 2 hours in  
191 the 37°C, 5% CO<sub>2</sub> and humid incubator. The absorbance was measured at 450 nm,  
192 and the experiment was repeated three times.

193

#### 194 **Detection of reactive oxygen species**

195 The cells were seeded on a black 96-well microplate with a transparent bottom at  $2.5$   
196  $\times 10^4$  cells per well, and cultured overnight. The medium was then removed and 100  
197  $\mu$ L of 1X buffer was added to each well. Next, the 1X buffer was removed and 100  $\mu$ L  
198 of diluted DCFDA solution added (Section 6.3) to stain the cells. The cells were  
199 incubated with diluted DCFDA solution in the dark for 45 minutes. The DCFDA  
200 solution was then removed, 100  $\mu$ L of 1X buffer or 1X PBS added to each well, and



201 fluorescence was measured immediately. In the presence of compound, medium or  
202 buffer, the fluorescence at Ex/Em = 485/535 nm was measured using automatic  
203 microplate reader ( Bio-tek ) end point mode.

204

### 205 **Flow cytometry**

206 For apoptosis detection, after culturing the cells in six-well plates for 24 hours, the  
207 cells were collected and washed with incubation buffer, suspended with 100  $\mu$ L of  
208 labeling solution, and incubated at room temperature for 10–15 minutes. Next, the  
209 fluorescent (SA-FLOUS) solution was added and was incubated at 4 °C in the dark  
210 for 20 minutes. Finally, the FITC fluorescence was detected at 515 nm and PI  
211 fluorescence was detected at 560 nm. Finally, samples were analyzed on FACSCalibur  
212 (BD Biosciences, San Jose, CA, USA). Data were analyzed with FlowJo software  
213 (Tree Star, Ashland, OR, USA).

214 For cell cycle progression, after culturing the cells in six-well plate for 24 hours,  
215 the cells were collected and fixed with 75% ethanol at 4 °C for 4 hours. Next, 400  $\mu$ L  
216 of CCAA solution (PI staining solution, Engreen, New Zealand) and 100  $\mu$ L RNase A  
217 (100  $\mu$ g/mL) was added and incubated at 4 °C in the dark for 30 minutes. Finally,  
218 samples were analyzed on FACSCalibur (BD Biosciences, San Jose, CA, USA). The  
219 generated histogram was used to calculate the ratio of cells in the G0/G1, S or G2/M  
220 phases.

221

### 222 **ROS inhibitor**

223  $5 \times 10^6$  hBMSCs were inoculated into 6-well plates, after the corresponding number of  
224 cell passages, P3-hBMSCs and P10-hBMSCs were stimulated with 2mM ROS  
225 inhibitor (NAC, KFS289, Beijing Baiolaibo Technology Co. LTD)

226

### 227 **Statistical analysis**

228 Data were presented as the mean  $\pm$  standard deviation (SD) for three repetitions per  
229 group. Student's t-test was used to analyze the differences between two groups, and

230 one-way (ANOVA) was used to analyze the differences between multiple groups. P-  
231 value <0.05 was considered as statistically significance.

232

## 233 **Results**

### 234 **Identification of differentially expressed proteins (DEPs) in replicative senescent** 235 **hBMSCs**

236 In our pilot study, unlabeled quantitative proteomics was used to analyze the proteins  
237 which were differentially expressed between P3-hBMSCs and P10-hBMSCs  
238 (Supplementary figure 1). The sequencing results showed that 50 proteins were  
239 differentially expressed, of which 25 were significantly up-regulated and 25 were  
240 significantly down-regulated in the replication senescent cells (Figure 1A). PCBP2  
241 was among the 25 significantly down-regulated proteins (Figure 1A, red arrow).

242 Gene ontology (GO) and Kyoto Encyclopedia of Genes and Genomes (KEGG)  
243 analyses were performed, and a variety of GO functions and KEGG signaling  
244 pathways seemed to be associated with these 50 DEPs. In GO cellular component  
245 annotations, the DEPs were significantly enriched in vacuolar lumen pathways,  
246 mitochondrial ribosome pathways, and organellar ribosome pathways. With respect to  
247 molecular function, the cadherin binding pathway, lamin binding pathway, and cell  
248 adhesion molecule binding pathway were significantly enriched in these DEPs. GO  
249 Biological Process terms included the endomembrane system organization pathway,  
250 protein-containing complex disassembly pathway, and vesicle budding from  
251 membrane pathway (Figure 1B). Using KEGG pathway analysis, DEPs were  
252 significantly enriched in endocytosis pathways, terpenoid backbone biosynthesis  
253 pathways, and the ferroptosis pathway (Figure 1C). These 50 DEPs in senescent  
254 hBMSCs seemed to affect a wide range of biological functions and signaling  
255 pathways, which might be associated with the underlying causes of cellular aging.

256

### 257 **Low expression of PCBP2 accentuated the characteristics of cell senescence in** 258 **hBMSCs**

259 As shown in Figure 1A, the expression of PCBP2, a gene downstream of the

260 ferroptosis pathway, was significantly down-regulated in P10-hBMSCs cells. The  
261 QRT-PCR (Figure 2A) and WB (Figure 2B) assays confirmed that the expression of  
262 PCBP2 was significantly lower in P10-hBMSCs than in P3-hBMSCs. A siRNA that  
263 knocked-down PCBP2 and a plasmid that over-expressed PCBP2 were constructed,  
264 and QRT-PCR and WB were used to evaluate the efficiency of knockdown and  
265 overexpression of PCBP2 in the cells (Supplementary figure 2). CCK-8 results  
266 showed that after over-expressing PCBP2, the viability of both P3-hBMSCs and P10-  
267 hBMSCs increased significantly (Figure 2C). On the contrary, after silencing PCBP2,  
268 the viability of both P3-hBMSCs and P10-hBMSCs weakened significantly (Figure  
269 2D).

270 Using flow cytometry, we found that, compared with P3-hBMSCs, P10-hBMSCs  
271 tended to remain in the G0/G1 phase of the cell cycle (Figure 2E and F). In P3-  
272 hBMSCs with over-expression of PCBP2, the cell cycle had no significant change.  
273 However, in P10-hBMSCs with over-expression of PCBP2, the number of cells in the  
274 G0/G1 phase decreased, while the number of cells in the mitotic phase increased  
275 significantly (Figure 2E). Meanwhile, in PCBP2 knocked-down P3-hBMSCs, the cell  
276 cycle was significantly blocked, with the number of cells in G0/G1 significantly  
277 increased while the numbers of cells in S phase and G2/M phase significantly  
278 decreased (Figure 2F). In PCBP2 knocked-down P10-hBMSCs, the cell cycle was  
279 further arrested, with the number of G0/G1 phase cells significantly increased and the  
280 number of S phase and G2/M phase cells significantly decreased (Figure 2F). These  
281 results demonstrated that an appropriate amount of PCBP2 could maintain the normal  
282 cell cycle, and abnormally low expression of PCBP2 would lead to arrest of the cell  
283 cycle in normal cells.

284 Flow cytometry also demonstrated that the cell apoptosis was substantially  
285 higher in P10-hBMSCs than in P3-hBMSCs (Figure 2G and H). Over-expression of  
286 PCBP2 significantly reduced apoptosis in both P3-hBMSCs and P10-hBMSCs  
287 (Figure 2G), whereas silencing of PCBP2 significantly increased apoptosis in both  
288 P3-hBMSCs and P10-hBMSCs (Figure 2H). These results suggested that the  
289 decreased expression of PCBP2 induced by cell replicative senescence might promote

290 the apoptosis of senescent cells.

291

292 **Low expression of PCBP2 accentuated the cell senescence of hBMSCs in a ROS-**  
293 **dependent way**

294 It is well known that ROS may have important effects on the cellular functions of  
295 different cells[19]. We used the functional gain-and-loss experiment to verify whether  
296 PCBP2 could influence the cellular functions of hBMSCs in a ROS-dependent  
297 pathway. The ROS detection results showed that over-expression of PCBP2 inhibited  
298 the production of ROS in both P3-hBMSCs and P10-hBMSCs (Figure 3A), while  
299 knockdown of PCBP2 increased the production of ROS in both P3-hBMSCs and P10-  
300 hBMSCs (Figure 3B). The increased ROS production caused by PCBP2 silence could  
301 be significantly rescued by adding 2mM of antioxidant NAC to PCBP2 silenced-P3-  
302 hBMSCs and P10-hBMSCs (Figure 3C). As shown in Figure 2, overexpression of  
303 PCBP2 promoted, while silencing PCBP2 inhibited the proliferation of P3-hBMSCs  
304 and P10-hBMSCs. Further CCK-8 results showed that the antioxidant NAC could  
305 significantly reverse the decrease in cell proliferation of P3-hBMSCs and P10-  
306 hBMSCs induced by silencing PCBP2 (Figure 3D). Moreover, the flow cytometry  
307 result showed that compared with P3-hBMSCs + si-PCBP2 group, the apoptosis of  
308 P3-hBMSCs + si-PCBP2+ NAC (2mM) group was substantially reduced, with similar  
309 results obtained in the P10-hBMSCs (Figure 3E). In addition, with the introduction of  
310 NAC (2mM) to PCBP2 silenced P3-hBMSCs and P10-hBMSCs, the proportion of  
311 cells in G0/G1 phase significantly reduced and the proportion of cells in S phase  
312 significantly increased. These results indicated that the low expression of PCBP2  
313 induced by cell replicative senescence could inhibit cell proliferation, and induce cell  
314 apoptosis and cell arrest by increasing the production of ROS.

315

316 **Antioxidant recovered the viability of senescent hBMSCs by suppressing FGF2**  
317 **expression**

318 In GSE95024, we found that after knockdown of PCBP2, 359 genes were  
319 significantly down-regulated and 332 genes were significantly up-regulated

320 (Supplementary Figure 3A), 17 of which were significantly enriched in pathways  
321 related the role of proteoglycans in cancer (Supplementary Figure 3B), including  
322 seven down-regulated genes: TIMP3, PAK1, HPSE2, HSPB2, PRKACB, WNT8B,  
323 and PLAUR, and 10 up-regulated genes: CAV1, FRS2, CCND1, CAV2, AKT3, SHH,  
324 FGF2, PIK3R3, WNT7A, and THBS1. Analysis of a protein interaction network  
325 generated from the STRING database, in which these genes are involved, indicates  
326 that there is a significant correlation between FGF2 and the other genes  
327 (Supplementary Figure 3C). Therefore, we further explored the regulatory role of  
328 PCBP2 on FGF2. The QRT-PCR results showed that over-expression of PCBP2 led to  
329 significantly reduced expression of the mRNA levels of FGF2 in both P3-hBMSCs  
330 and P10-hBMSCs (Figure 4A). When PCBP2 was silenced, the mRNA levels of  
331 FGF2 significantly increased in both P3-hBMSCs and P10-hBMSCs (Figure 4B). The  
332 results of WB demonstrated that over-expression of PCBP2 led to significantly  
333 reduced protein expressions of FGF2 in both P3-hBMSCs and P10-hBMSCs (Figure  
334 4C) and down regulation of PCBP2 led to a converse result (Figure 4D). This up-  
335 regulation of FGF2 from suppression of PCBP2 could be stopped by the antioxidant  
336 NAC (Figure 4E).

337

### 338 **Low expression of PCBP2 accentuated the senescent characteristics of hBMSCs** 339 **through FGF2 overexpression**

340 Then, the function recovery experiment was used to verify whether PCBP2  
341 regulates cell function through FGF2. CCK-8 results showed that compared with the  
342 PCBP2 overexpression group, the cell proliferation of P3-hBMSCs (Figure 5A) and  
343 P10-hBMSCs (Figure 5B) decreased significantly in the OE-PCBP2+OE-FGF2  
344 group. We further used flow cytometry to detect cell apoptosis in each group. In P3-  
345 hBMSCs, overexpression of PCBP2 could significantly inhibit cell apoptosis, and  
346 overexpression of FGF2 does not significantly reverse the inhibitory effect of PCBP2  
347 on apoptosis (Figure 5C). However, overexpression of FGF2 significantly reversed  
348 the apoptotic effect of PCBP2 on P10-hBMSCs (Figure 5D). In addition, compared  
349 with the OE-NC P3-hBMSCs and OE-NC P10-hBMSCs, the G0/G1 phase cell ratio

350 was significantly reduced (Figure 5E) and the S phase cell ratio was significantly  
351 increased in the OE-PCBP2 group (Figure 5F). Moreover, compared with P3-  
352 hBMSCs (Figure 5E) and P10-hBMSCs (Figure 5F) in the OE-PCBP2 group,  
353 overexpression of FGF2 significantly reversed the PCBP2-induced cell G0/G1 phase  
354 inhibition and S phase promotion. In addition to G0/G1 phase and S phase,  
355 overexpression of FGF2 can significantly reverse the effect of PCBP2 on the G2/M  
356 phase of P10-hBMSCs (Figure 5F). These results indicated that the introduction of  
357 PCBP2 promotes cell proliferation, and inhibits cell apoptosis and cell arrest by  
358 inhibiting the expression of FGF2.

359

## 360 **Discussion**

361 In this work, we identified an intrinsic factor of cell aging, PCBP2, via unlabeled  
362 quantitative proteomics and characterized its biological role in the cell replicative  
363 senescence of hBMSCs *in vitro*. Low expression of PCBP2 in the replicative  
364 senescent hBMSCs inhibited the proliferation, promoted the apoptosis and the cell  
365 cycle arrest through a ROS- FGF2 dependent pathway.

366 Generally, cell senescence is regarded as an irreversible cell cycle arrest, which  
367 is considered to be an evolutionary process established and maintained by the p16  
368 <sup>INK4A</sup> and/or p53-p21 pathway[20]. However, with the suppression of p53 expression,  
369 senescent mouse embryonic fibroblasts rapidly re-entered the cell cycle[21], which  
370 inspired us with new understanding of cell senescence. The phenotype of cellular  
371 senescence is triggered by a variety of senescence stressors, which in turn affect  
372 multiple signaling pathways and gene expressions[20]. In order to validate the results  
373 of our pilot study we used QRT-PCR and WB analysis and confirmed that both the  
374 mRNA and protein expressions of PCBP2 were substantially lower in the senescent  
375 P10-hBMSCs than in the non-senescent P3-hBMSCs. Therefore, PCBP2 should be an  
376 intrinsic factor for cell aging and participate in the senescence of hBMSCs.

377 Cell cycle arrest, loss of cell proliferation and increase of cell apoptosis are the  
378 main characteristic of cell senescence[22]. In present study, we found that PCBP2  
379 silencing significantly promoted the retention of hBMSCs in the G0/G1 phase and

380 significantly reduced the proportion of cells in the S and G2/M phases. These results  
381 are consistent with previous reports that in MEFs, the loss of PCBP2 leads to the  
382 decrease of p73 expression, which in turn leads to the acceleration of cell  
383 senescence[3]. Meanwhile, we found that the apoptosis of replicative senescent  
384 hBMSCs increased after PCBP2 was silenced, while decreased after PCBP2 was  
385 over-expressed. After multiple proliferation and division of cells, the telomeres  
386 shorten, the cells reach the limit of normal cell division and turn into replicative  
387 senescence. This process is also known as Hayflick limit[23]. Over-expression of  
388 PCBP2 in the P10-hBMSCs promoted the proliferation of the replicative senescent  
389 cells, suggesting that PCBP2 might have the ability to extend the Hayflick limit or  
390 waken the cells from replicative senescence. Further studies are needed to verify these  
391 findings.

392 Cell senescence can be induced by many factors, such as oxidative stress, cell  
393 culture and telomere shortening, and disturbances in mitochondrial homeostasis[24].  
394 Abnormal mitochondrial homeostasis leads to an increase in the production of  
395 ROS[25]. Meanwhile, mitochondrial ROS aggravate cell senescence by enhancing  
396 DNA damage[26], which in turn forms the characteristic phenotype of senescent cells.  
397 Ren et al[3] reported that PCBP2 could inhibit the production of ROS by regulating  
398 the mRNA stability of p73 in MEFs. By interfering with the expression of PCBP2, we  
399 investigated the role of PCBP2 on the production of ROS in hBMSCs, and obtained  
400 similar results. It is report that PCBP2 is a versatile adaptor protein that binds iron and  
401 delivers it to ferritin for storage[27]. The main components of iron are stored in  
402 mitochondria, lysosomes, cytosol and nucleus, at concentrations of  $\sim 16\mu\text{M}$ ,  $\sim 16\mu\text{M}$ ,  
403  $\sim 6\mu\text{M}$  and  $\sim 7\mu\text{M}$ , respectively[28]. Iron overload at the cellular level leads to an  
404 increase in ROS production, and result in oxidative stress[29]. However, the  
405 expression of PCBP2 was low in the replicative senescent hBMSCs, suggesting that  
406 the increase of ROS production in the senescent cells with low expression of PCBP2  
407 might not depend on the transfer of iron. Future studies on the regulation mechanism  
408 of PCBP2 on ROS production are needed.

409 We found that down-regulating the expression of PCBP2 in hBMSCs could



410 increase the ROS production in the cells. ROS are involved in regulating the activity  
411 of multiple signaling pathways, which are related to cell growth, cell apoptosis and  
412 the cell cycle [30]. Moderate level of ROS initiates the differentiation of stem cells,  
413 while high level of ROS leads to cell senescence and cell death of stem cells[31].  
414 Through functional recovery experiments, we found that over-expression of PCBP2  
415 promoted the proliferation and inhibited the apoptosis and cell cycle arrest of P10-  
416 hBMSCs in a ROS-dependent way. This result not only challenges the traditional  
417 theory that cell senescence is irreversible cell cycle arrest[32], but also indicates that  
418 the replicative senescent hBMSCs can be wakened in some extent by interventions on  
419 the production of ROS.

420 As mentioned in the introduction, FGF-2 can be released by ROS [12-14]. Our  
421 experiment also demonstrated that the increase of FGF2 induced by decreased PCBP2  
422 expression can be reversed by oxidative stress inhibitors. Therefore, we concluded  
423 that PCBP2 inhibits ROS expression to a certain extent, and low ROS expression  
424 reduced FGF2 production, thus regulating the aging of hBMSCs cells. FGF2  
425 promotes catabolism and subsequent anabolism by specifically binding to  
426 FGFR1[33], and is involved in regulating multiple downstream signal pathways,  
427 including PI3K/AKT, STAT1/p21 and RAS/MAPK kinase pathways[34]. Therefore,  
428 FGF2 plays an important role in regulating cell function. Through sequencing  
429 analysis, we found that when PCBP2 was knocked down, the expression of FGF2 was  
430 significantly increased, which was confirmed by QRT-PCR and WB. Combined with  
431 the functional recovery experiment, we found that overexpression of PCBP2 in the  
432 P10- hBMSCs could promote cell proliferation and make the cells re-enter into the S  
433 phase and G2/M phase, while inhibit the apoptosis of the cells by inhibiting FGF2.  
434 However, whether FGF2 mediates the cellular functions of hBMSCs through  
435 PI3K/AKT, STAT1/p21 and RAS/MAPK kinase pathways remains to be confirmed.

436 In conclusion, this study initially elucidates that PCBP2 as an intrinsic aging  
437 factor regulates the replicative senescence of hBMSCs through the ROS-FGF2  
438 signaling axis. However, how does FGF2 interact with ROS in hBMSCs? In addition  
439 to FGF2 and ROS, does PCBP2 have other potential mechanisms for the aging of



440 hBMSCs? These questions remain to be answered in future research.

441

#### 442 **Acknowledgment**

443 This study was supported by the National Natural Science Foundation of China  
444 (82172474).

445

#### 446 **References**

447 [1] Ganguly P, El-Jawhari JJ, Giannoudis PV, Burska AN, Ponchel F, Jones EA (2017).

448 Age-related Changes in Bone Marrow Mesenchymal Stromal Cells: A Potential

449 Impact on Osteoporosis and Osteoarthritis Development. *Cell Transplant*, 26:1520-

450 1529.

451 [2] Gibon E, Lu L, Goodman SB (2016). Aging, inflammation, stem cells, and bone

452 healing. *Stem Cell Res Ther*, 7:44.

453 [3] Ren C, Zhang J, Yan W, Zhang Y, Chen X (2016). RNA-binding Protein PCBP2

454 Regulates p73 Expression and p73-dependent Antioxidant Defense. *J Biol Chem*,

455 291:9629-9637.

456 [4] Schieber M, Chandel NS (2014). ROS function in redox signaling and oxidative stress.

457 *Curr Biol*, 24:R453-462.

458 [5] Luo Z, Xu X, Sho T, Zhang J, Xu W, Yao J, *et al.* (2019). ROS-induced autophagy

459 regulates porcine trophectoderm cell apoptosis, proliferation, and differentiation. *Am J*

460 *Physiol Cell Physiol*, 316:C198-C209.

461 [6] Cheng Y, Lin KH, Young TH, Cheng NC (2020). The influence of fibroblast growth

462 factor 2 on the senescence of human adipose-derived mesenchymal stem cells

463 during long-term culture. *Stem Cells Transl Med*, 9:518-530.

- 464 [7] Zhou J, Liu Z, Zhang L, Hu X, Wang Z, Ni H, *et al.* (2020). Activation of beta(2)-  
465 Adrenergic Receptor Promotes Growth and Angiogenesis in Breast Cancer by Down-  
466 regulating PPAR gamma. *Cancer Research and Treatment*, 52:830-847.
- 467 [8] Salotti J, Dias MH, Koga MM, Armelin HA (2013). Fibroblast growth factor 2 causes  
468 G2/M cell cycle arrest in ras-driven tumor cells through a Src-dependent pathway.  
469 *PLoS One*, 8:e72582.
- 470 [9] Chen L, Carlton M, Chen X, Kaur N, Ryan H, Parker T, *et al.* (2021). Effect of  
471 fibronectin, FGF-2, and BMP4 in the stemness maintenance of BMSCs and the  
472 metabolic and proteomic cues involved. 12:165.
- 473 [10] Li D, Cheng P, Jiang H, Cao T, Wang J, Gao Y, *et al.* (2018). Vascularization  
474 converts the lineage fate of bone mesenchymal stem cells to endothelial cells in  
475 tissue-engineered bone grafts by modulating FGF2-RhoA/ROCK signaling. 9:959.
- 476 [11] Xiao L, Esliger A, Hurley MJ, Job, Bone marrow stromal cell, Research M (2013). Nuclear  
477 fibroblast growth factor 2 (FGF2) isoforms inhibit bone marrow stromal cell  
478 mineralization through FGF23/FGFR/MAPK in vitro. 28:35-45.
- 479 [12] Kalghatgi S, Friedman G, Fridman A, Clyne AM (2010). Endothelial cell proliferation  
480 is enhanced by low dose non-thermal plasma through fibroblast growth factor-2  
481 release. *Ann Biomed Eng*, 38:748-757.
- 482 [13] Chien SY, Huang CY, Tsai CH, Wang SW, Lin YM, Tang CH (2016). Interleukin-1 $\beta$   
483 induces fibroblast growth factor 2 expression and subsequently promotes endothelial  
484 progenitor cell angiogenesis in chondrocytes. *Clin Sci (Lond)*, 130:667-681.
- 485 [14] Arjunan KP, Friedman G, Fridman A, Clyne AM (2012). Non-thermal dielectric barrier

- 486 discharge plasma induces angiogenesis through reactive oxygen species. *J R Soc*  
487 *Interface*, 9:147-157.
- 488 [15] Liu T, Zheng X, Wang C, Wang C, Jiang S, Li B, *et al.* (2021). The m(6)A "reader"  
489 YTHDF1 promotes osteogenesis of bone marrow mesenchymal stem cells through  
490 translational control of ZNF839. *Cell Death Dis*, 12:1078.
- 491 [16] Bonab MM, Alimoghaddam K, Talebian F, Ghaffari SH, Ghavamzadeh A, Nikbin B  
492 (2006). Aging of mesenchymal stem cell in vitro. *BMC Cell Biol*, 7:14.
- 493 [17] Shi GX, Zheng XF, Zhu C, Li B, Wang YR, Jiang SD, *et al.* (2017). Evidence of the  
494 Role of R-Spondin 1 and Its Receptor Lgr4 in the Transmission of Mechanical Stimuli  
495 to Biological Signals for Bone Formation. *Int J Mol Sci*, 18.
- 496 [18] Zheng XF, Zhao ED, He JY, Zhang YH, Jiang SD, Jiang LS (2016). Inhibition of  
497 substance P signaling aggravates the bone loss in ovariectomy-induced osteoporosis.  
498 *Prog Biophys Mol Biol*, 122:112-121.
- 499 [19] Milkovic L, Cipak Gasparovic A, Cindric M, Mouthuy PA, Zarkovic N (2019). Short  
500 Overview of ROS as Cell Function Regulators and Their Implications in Therapy  
501 Concepts. *Cells*, 8.
- 502 [20] Cheng LQ, Zhang ZQ, Chen HZ, Liu DP (2017). Epigenetic regulation in cell  
503 senescence. *J Mol Med (Berl)*, 95:1257-1268.
- 504 [21] Dirac AM, Bernards R (2003). Reversal of senescence in mouse fibroblasts through  
505 lentiviral suppression of p53. *J Biol Chem*, 278:11731-11734.
- 506 [22] Dodig S, Cepelak I, Pavic I (2019). Hallmarks of senescence and aging. *Biochem*  
507 *Med (Zagreb)*, 29:030501.

- 508 [23] Liu J, Wang L, Wang Z, Liu JP (2019). Roles of Telomere Biology in Cell Senescence,  
509 Replicative and Chronological Ageing. *Cells*, 8.
- 510 [24] Regulski MJ (2017). Cellular Senescence: What, Why, and How. *Wounds*, 29:168-  
511 174.
- 512 [25] Victorelli S, Passos JF (2019). Reactive Oxygen Species Detection in Senescent  
513 Cells. *Methods Mol Biol*, 1896:21-29.
- 514 [26] Passos JF, Nelson G, Wang C, Richter T, Simillion C, Proctor CJ, *et al.* (2010).  
515 Feedback between p21 and reactive oxygen production is necessary for cell  
516 senescence. *Mol Syst Biol*, 6:347.
- 517 [27] Frey AG, Nandal A, Park JH, Smith PM, Yabe T, Ryu MS, *et al.* (2014). Iron  
518 chaperones PCBP1 and PCBP2 mediate the metallation of the dinuclear iron enzyme  
519 deoxyhypusine hydroxylase. *Proc Natl Acad Sci U S A*, 111:8031-8036.
- 520 [28] Paul BT, Manz DH, Torti FM, Torti SV (2017). Mitochondria and Iron: current  
521 questions. *Expert Rev Hematol*, 10:65-79.
- 522 [29] Andrews NC (1999). Disorders of iron metabolism. *N Engl J Med*, 341:1986-1995.
- 523 [30] Zheng WL, Wang BJ, Wang L, Shan YP, Zou H, Song RL, *et al.* (2018). ROS-  
524 Mediated Cell Cycle Arrest and Apoptosis Induced by Zearalenone in Mouse Sertoli  
525 Cells via ER Stress and the ATP/AMPK Pathway. *Toxins (Basel)*, 10.
- 526 [31] Bigarella CL, Liang R, Ghaffari S (2014). Stem cells and the impact of ROS signaling.  
527 *Development*, 141:4206-4218.
- 528 [32] de Magalhaes JP, Passos JF (2018). Stress, cell senescence and organismal ageing.  
529 *Mech Ageing Dev*, 170:2-9.

530 [33] Yan D, Chen D, Cool SM, van Wijnen AJ, Mikecz K, Murphy G, *et al.* (2011).

531 Fibroblast growth factor receptor 1 is principally responsible for fibroblast growth

532 factor 2-induced catabolic activities in human articular chondrocytes. *Arthritis Res*

533 *Ther*, 13:R130.

534 [34] Teven CM, Farina EM, Rivas J, Reid RR (2014). Fibroblast growth factor (FGF)

535 signaling in development and skeletal diseases. *Genes Dis*, 1:199-213.

536

### 537 **Acknowledgments**

538 We acknowledge all the participants in this study. This study was supported by the

539 National Natural Science Foundation of China [82172474].

540

### 541 **Conflicts of interest**

542 All authors declare no conflict of interest.

543

544

545 **Figure legend**

546 **Fig. 1. DEPs in replication senescent hBMSCs and their biological functions. (A)**

547 A hub of 50 significantly DEPs induced by replication aging were shown as a

548 heatmap. GO functions **(B)** and KEGG pathways **(C)** affected by these 50 DEPs.

549 Notes:  $P < 0.05$  and  $\log_{2}FC \geq 2$  was regarded as indicating significance.

550

551 **Fig. 2. Low expression of PCBP2 accentuated the characteristics of cell**

552 **senescence in hBMSCs (A)** RT-PCR and **(B)** WB detection for the expression of

553 PCBP2 in P3-hBMSCs and P10-hBMSCs. CCK-8 assay for the effects of PCBP2

554 overexpression **(C)** and PCBP2 silencing **(D)** on the proliferation of P3-hBMSCs and

555 P10-hBMSCs. Flow cytometry detection for the effects of PCBP2 overexpression **(E)**

556 and PCBP2 silencing **(F)** on the cell cycle of P3-hBMSCs and P10-hBMSCs. The

557 effects of PCBP2 overexpression **(G)** and PCBP2 silencing **(H)** on apoptosis of P3-

558 hBMSCs and P10-hBMSCs were also detected by flow cytometry. Data were

559 presented as mean  $\pm$  SD ( $n = 3$ ). \* $P < 0.05$ , \*\* $P < 0.01$  and \*\*\* $P < 0.001$ ;  $\beta$ -actin and

560  $\alpha$ -tubulin were used as the internal references for mRNA and protein detection.

561

562 **Fig. 3. Low expression of PCBP2 inhibits cell proliferation, and promotes cell**

563 **apoptosis and cell arrest in a ROS-dependent way. (A)** overexpression and **(B)**

564 silencing of PCBP2 on ROS production in P3-hBMSCs and P10-hBMSCs. **(C)** The

565 inhibitory effect of 2mM NAC on ROS production in P3-hBMSCs and P10-hBMSCs

566 with silenced PCBP2. **(D)** CCK-8 test showed that the antioxidant NAC significantly

567 recovered the suppressed cell proliferation in P3-hBMSCs with silenced PCBP2.

568 Flow cytometry was used to detect the effects of 2mM NAC on the apoptosis **(E)** and

569 cycle **(F)** of PCBP2 silenced P3-hBMSCs and P10-hBMSCs. Notes: Data were

570 presented as mean  $\pm$  SD ( $n = 3$ ). \* $P < 0.05$ , \*\* $P < 0.01$  and \*\*\* $P < 0.001$ .

571

572 **Fig. 4. PCBP2 inhibits the expression of FGF2 in P3-hBMSCs and P10-hBMSCs.**

573 The regulation of FGF2 mRNA levels by overexpression **(A)** and silencing **(B)** of

574 PCBP2 was detected by RT-PCR, and were confirmed in protein levels via WB assay

575 (C, D). (E) up-regulation of FGF2 protein level in P3-hBMSCs with silenced PCBP2  
576 was stopped by 2mM NAC. Notes: Data were presented as mean  $\pm$  SD (n = 3). \*P <  
577 0.05, \*\*P < 0.01 and \*\*\*P < 0.001;  $\beta$ -actin and  $\alpha$ -tubulin was used as the internal  
578 reference for mRNA and proteins detection.

579

580 **Fig. 5. Overexpression of PCBP2 promotes cell proliferation, and inhibits cell**  
581 **apoptosis and cell arrest in a FGF2-dependent way.** CCK-8 detects the effect of  
582 overexpression of PCBP2 and FGF2 on the cell proliferation of P3-hBMSCs (A) and  
583 P10-hBMSCs (B). Flow cytometry was used to detect the apoptosis of P3-hBMSCs  
584 (C) and P10-hBMSCs (D) in NC, OE-PCBP2 and OE-PCBP2 + OE-FGF2 groups. In  
585 addition, in NC group, OE-PCBP2 group and OE-PCBP2+OE-PCBP2 group, the cell  
586 cycle of P3-hBMSCs (E) and P10-hBMSCs (F) were detected by flow cytometry.  
587 Notes: Data were presented as mean  $\pm$  SD (n = 3). \*P < 0.05, \*\*P < 0.01 and \*\*\*P <  
588 0.001.

589

#### 590 **Supplementary figure legends**

591 **Supplementary Fig. 1. Unlabeled quantitative proteomics for the DEPs between**  
592 **P3-hBMSCs and P10-hBMSCs.** The enzymolysis products were separated by  
593 capillary high-performance liquid chromatography and then analyzed by Thermo  
594 Fisher Fusion Mass Spectrometer (Thermo Fisher). The content of each peptide was  
595 expressed by detecting the intensity of positive ions, and protein analysis was  
596 performed using Maxquant software (version number 1.6.0.1).

597

598 **Supplementary Fig. 2. Validation of transfection effect of PCBP2.** The mRNA  
599 expression of PCBP2 after transfection with plasmids that over-expressed PCBP2 (A)  
600 and siRNA that knocked-down PCBP2 (B). The effect of over-expressing PCBP2 (C)  
601 and knocking-down PCBP2 (D) as detected by WB. Notes: Data were presented as  
602 mean  $\pm$  SD (n = 3). \*P < 0.05, \*\*P < 0.01 and \*\*\*P < 0.001;  $\beta$ -actin and  $\alpha$ -tubulin  
603 was used as the internal reference for mRNA and proteins detection.

604

605 **Supplementary Figure 3. Identification of the downstream genes of PCBP2.**

606 Volcano gram of differentially expressed genes caused by PCBP2 silencing **(A)**.

607 Bubble diagram of KEGG pathway analysis of differentially expressed genes **(B)**. The

608 interaction of differentially expressed proteins was predicted by STRING website.

609

610 **Table**

Table1. The primers used in qRT-PCR

| Gene name      | Primer sequences                     |
|----------------|--------------------------------------|
| PCBP2          | Forward: 5'-ATFGTCATTTTAGCTGGATC-3'  |
|                | Reverse: 5'-GATAGATCGTGAAATGCT-3'    |
| FGF2           | Forward: 5'-AGAAGAGCGACCCTCACATCA-3' |
|                | Reverse: 5'-CGGTLAGCACACACTCCTTTG-3' |
| $\beta$ -actin | Forward: 5'-GCTCTAGGCGGACTGTAC-3'    |
|                | Reverse: 5'-CCATGCCAATGTTGTCTCTT-3'  |

Three separate experiments were performed for each sample, and the  $2^{-\Delta\Delta Ct}$  value was used to calculate the relative expression.

611

612



613 **FIGURES**

614

615 **Figure1**

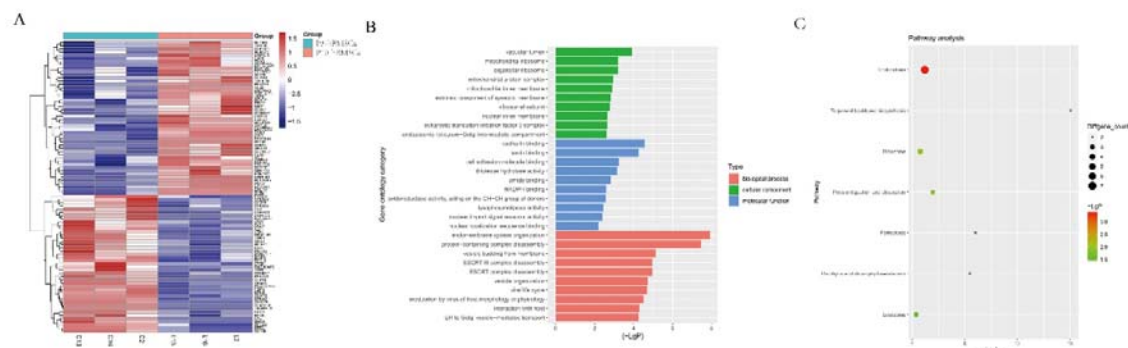

616

617

618

619

620

621 **Figure2**

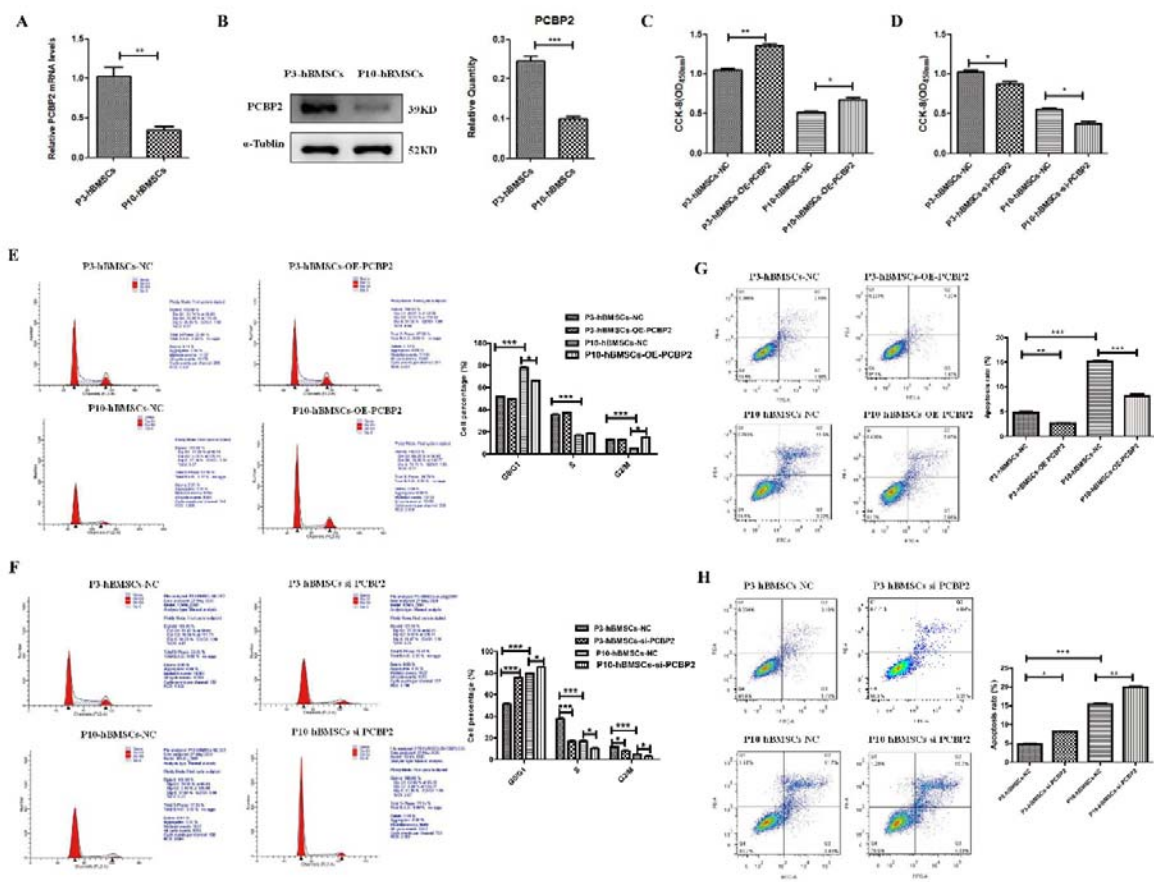

622  
623  
624  
625  
626  
627  
628  
629

630 **Figure3**

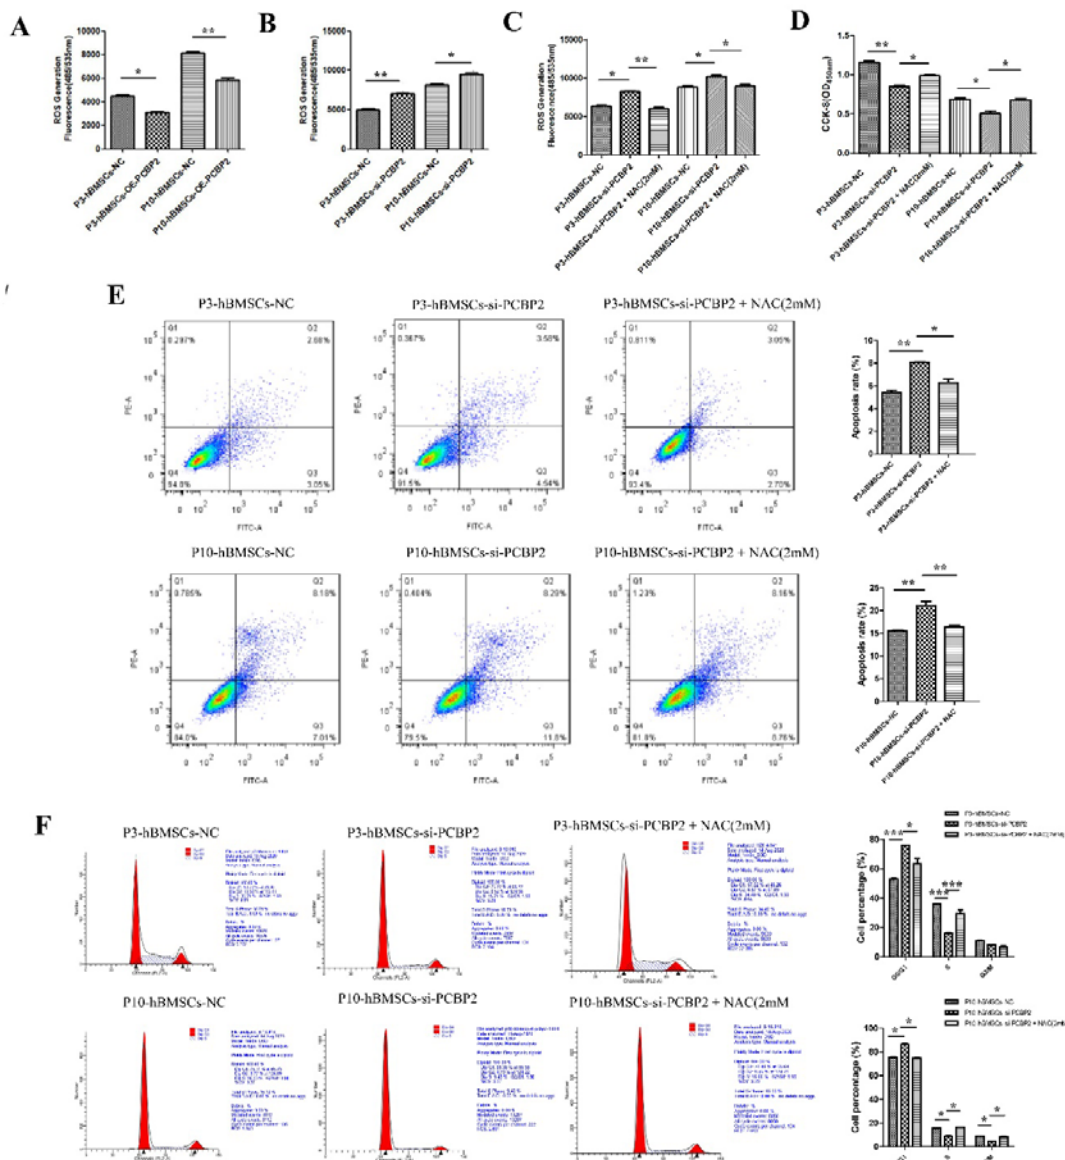

631  
632  
633  
634  
635  
636  
637  
638  
639  
640  
641  
642  
643

644 **Figure4**

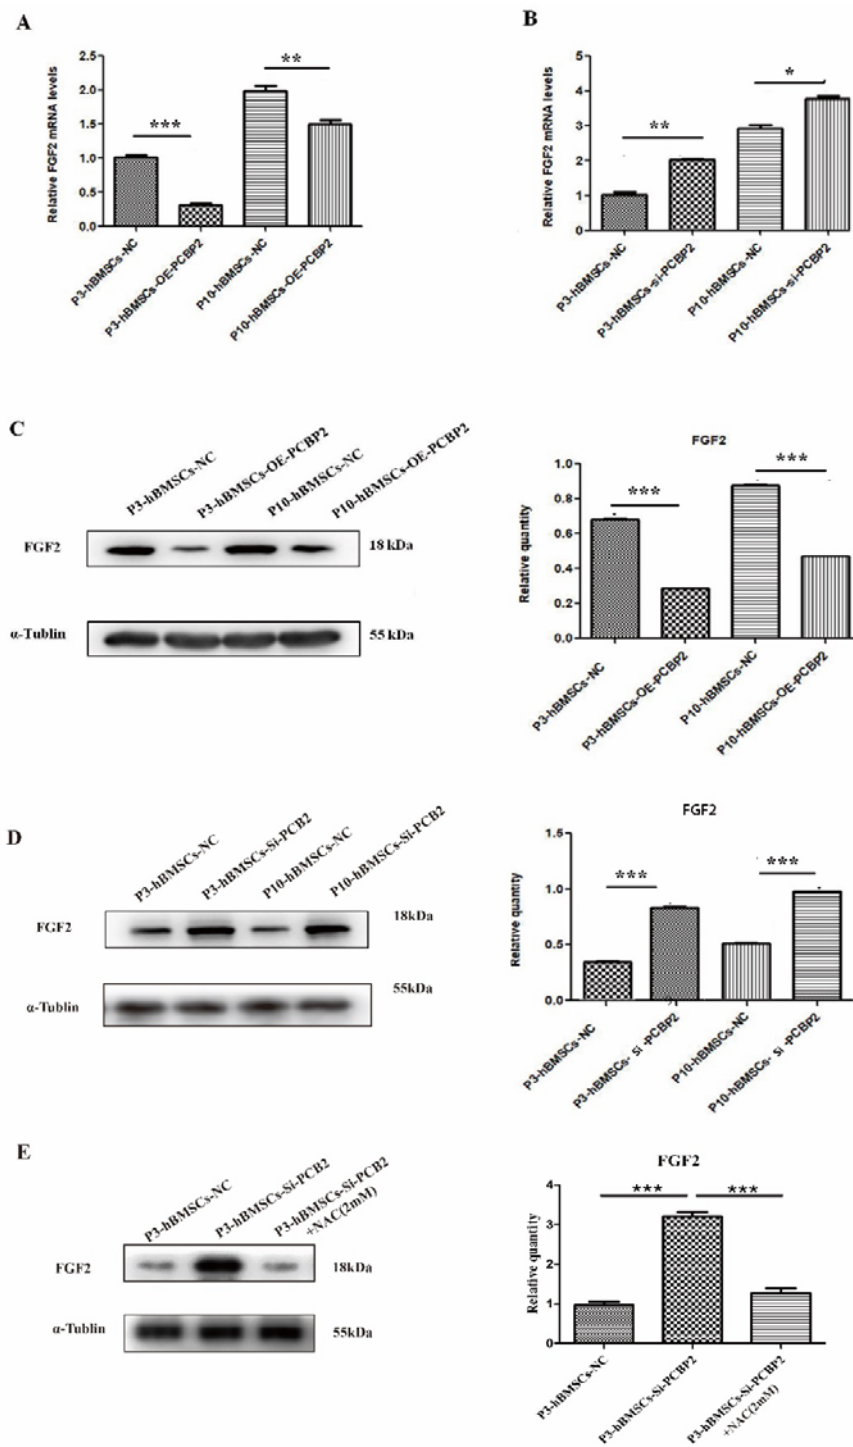

645

646

647

648

649

650

651 **Figure5**

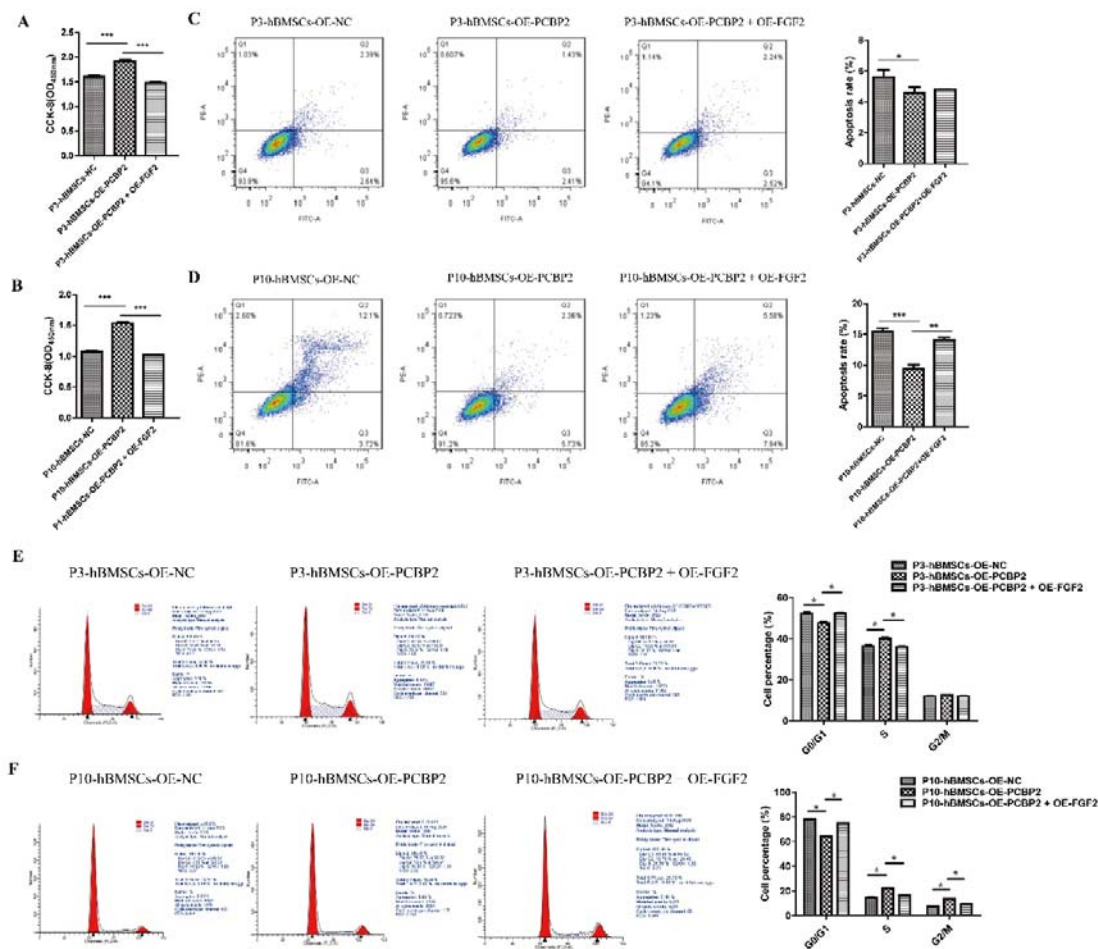

652

653

654

655 **Supplementary Figures.**

656

657 **Supplementary Figure 1**

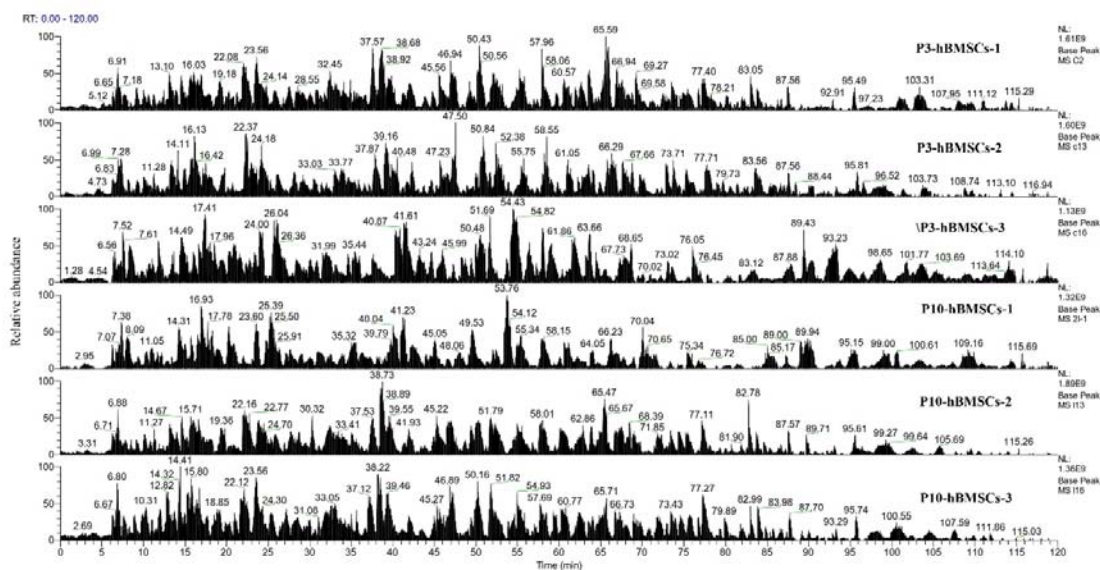

658

659



660 **Supplementary Figure 2**

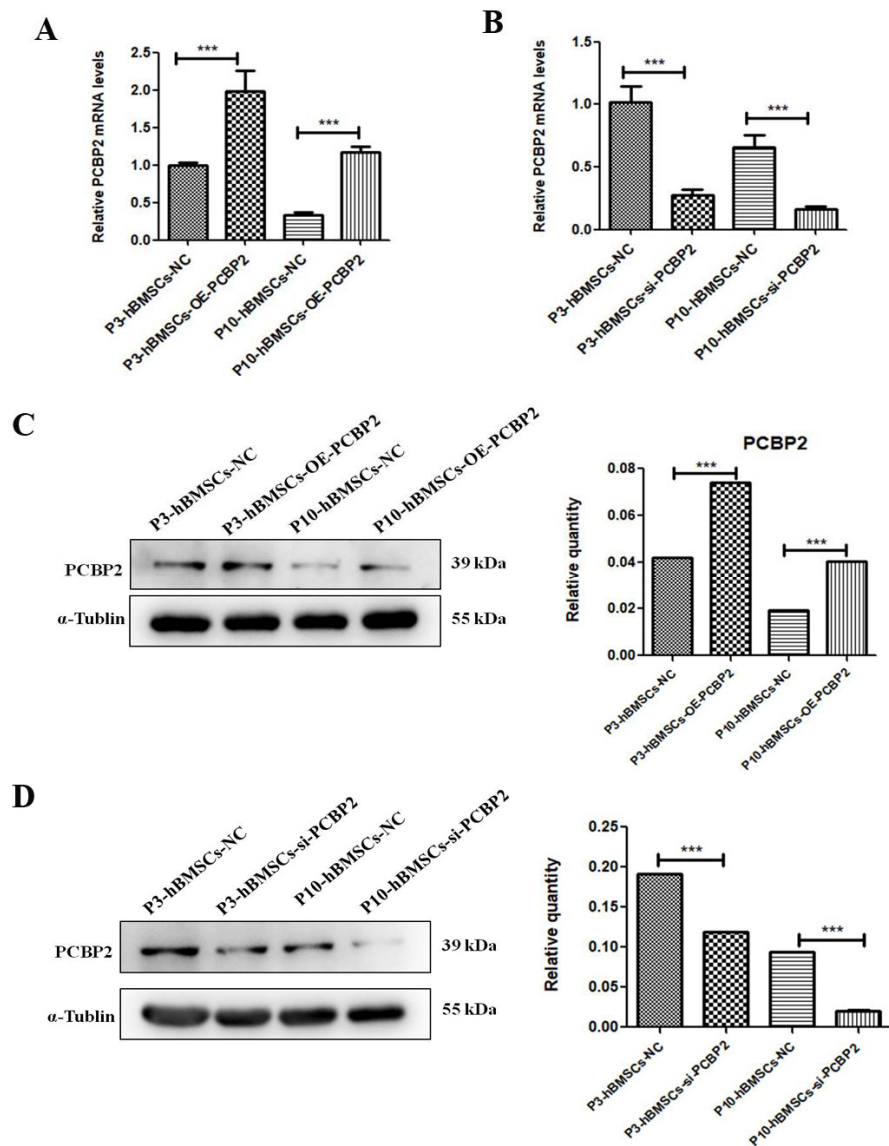

661

662

663

664

665 **Supplementary Figure 3**

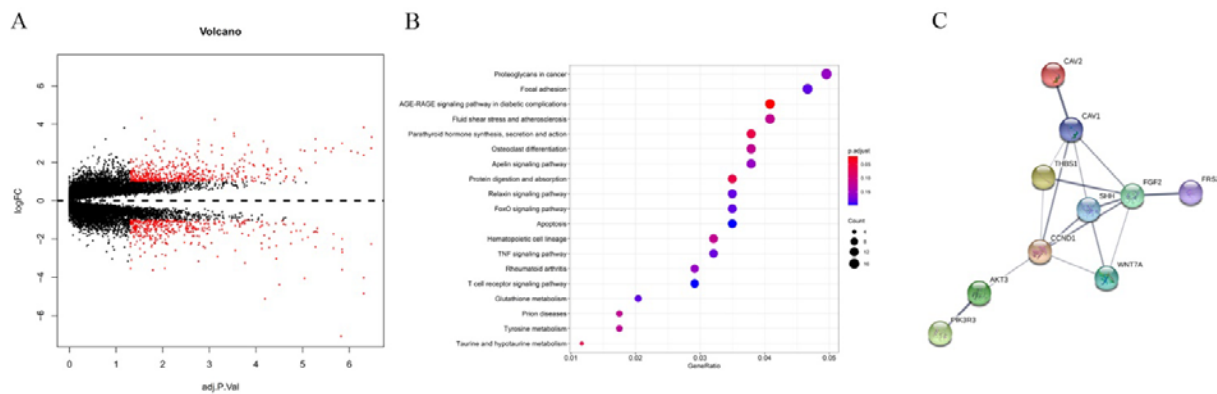

666

667

668
